# Supplementary material for: The Peptide Hormone CNMa Influences Egg Production in the Mosquito Aedes aegypti
Source: MDPI journal article supplement (doi:10.3390/insects13030230), 2022-02-25
Supplement: s1 [file s1]

**Table S1:** Primers used in this study

| Target gene       | Vectorbase accession | Purpose | Forward primer                                        | Reverse primer                                       |
|-------------------|----------------------|---------|-------------------------------------------------------|------------------------------------------------------|
| <i>AeCNMa</i>     | AAEL010529           | qPCR    | CTTTTGCAAATTGTGGGAAAC                                 | AAAGTTTGGACAGGTTCTCT                                 |
|                   |                      | RNAi    | TAATACGACTCACTATAGGGAGAT <u>GTATTACACATTGGAGCTGC</u>  | TAATACGACTCACTATAGGGAGAA <u>AGTTCCAGAAGCTCAAGTAC</u> |
| <i>AeCNMaR-1a</i> | AAEL024199           | qPCR    | TATTACACTCCAGCACTGGTC                                 | GCCAGGTAATAAGATGAGGAT                                |
|                   |                      | RNAi    | TAATACGACTCACTATAGGGAGAA <u>AGTTGGACTTACCTTTCTTGG</u> | TAATACGACTCACTATAGGGAGACTTCCCGTACATCACAGATAG         |
| <i>AeCNMaR-1b</i> | AAEL018316           | qPCR    | GCCATGAATGAAACCATCTG                                  | GTAAATGGAACCACGAACAC                                 |
|                   |                      | RNAi    | TAATACGACTCACTATAGGGAGAG <u>TAGTTACGACATCGATCAGC</u>  | TAATACGACTCACTATAGGGAGAGCTGATAAACACTCCAATCAG         |

Underlined sequences denote gene-specific portion of dsRNA synthesis primers
